# Supplementary material for: Virtual reality and motor imagery for early post-stroke rehabilitation
Source: PubMed Central journal article supplement (PMC10320905; doi:10.1186/s12938-023-01124-9), 2023-07-05
Supplement: 12938_2023_1124_MOESM1_ESM.pdf [file 12938_2023_1124_MOESM1_ESM.pdf]

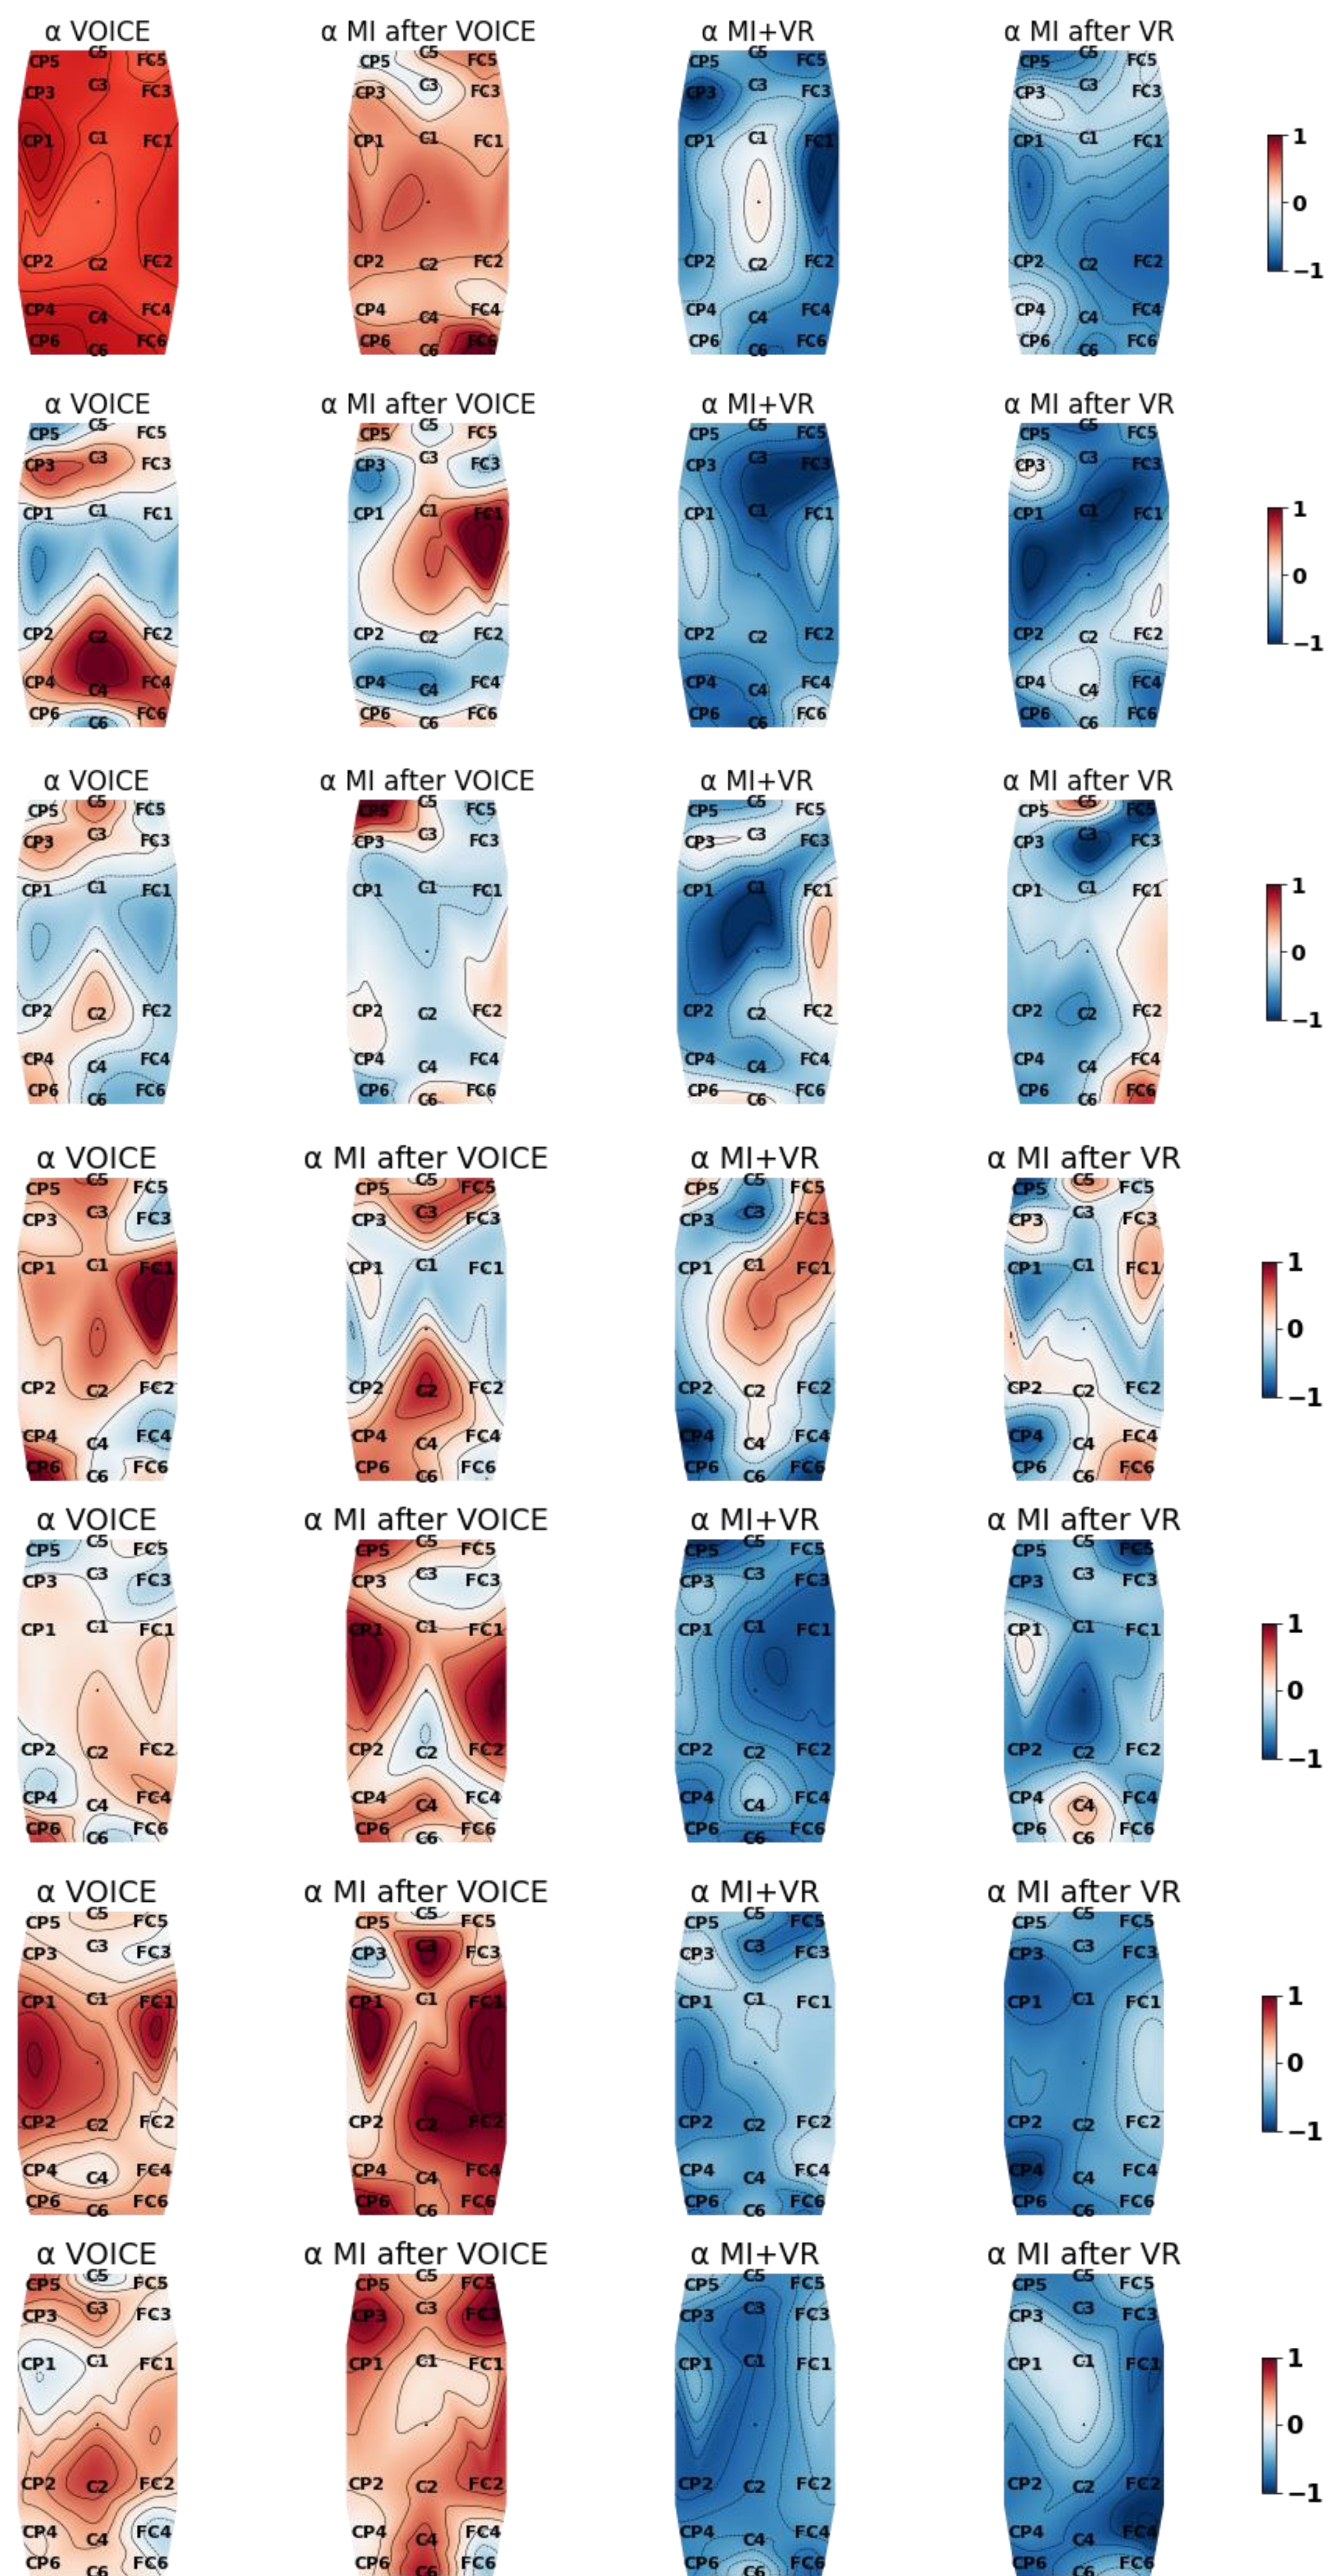

Figure 1:  $\alpha$  band power scalp maps of stroke patients 1 to 7 (top row to bottom row) from Experiment 1 showing the intensity variations normalised relative to classes: VOICE, MI after VOICE, MI+VR and MI after VR. Red is 1 = maximum; blue is -1 = minimum.



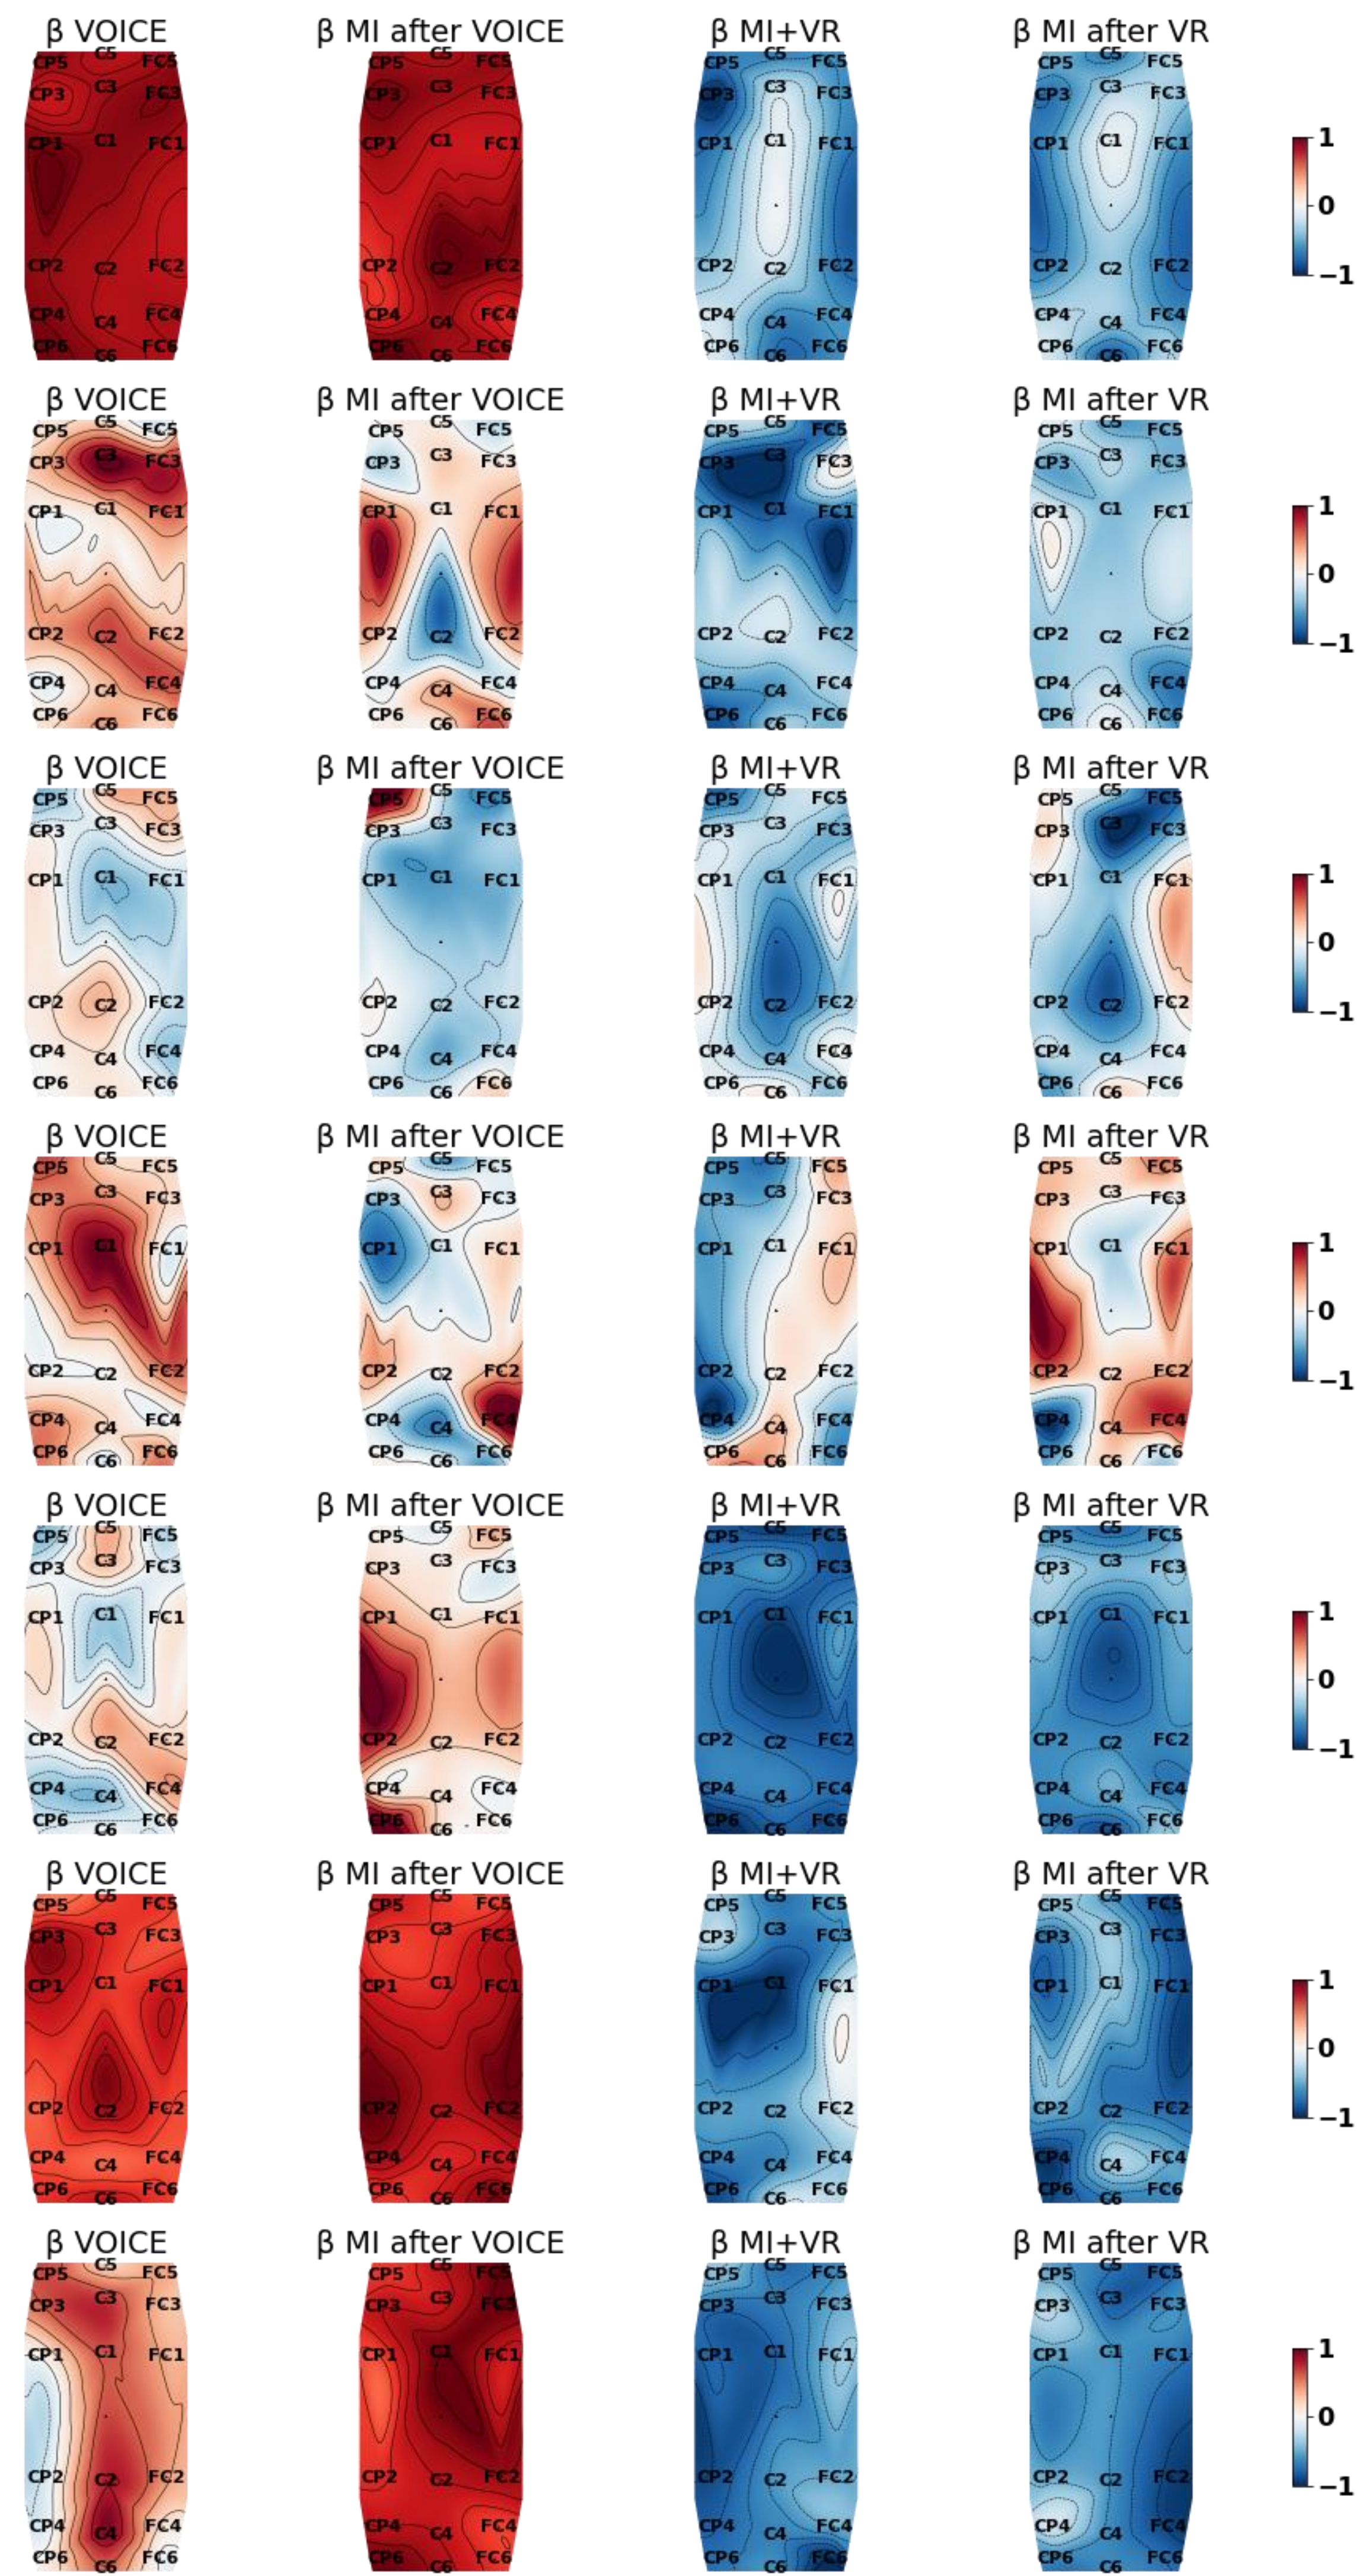

Figure 2:  $\beta$  band power scalp maps of stroke patients 1 to 7 (top row to bottom row) from Experiment 1 showing the intensity variations normalised relative to classes: VOICE, MI after VOICE, MI+VR and MI after VR. Red is 1 = maximum; blue is -1 = minimum.



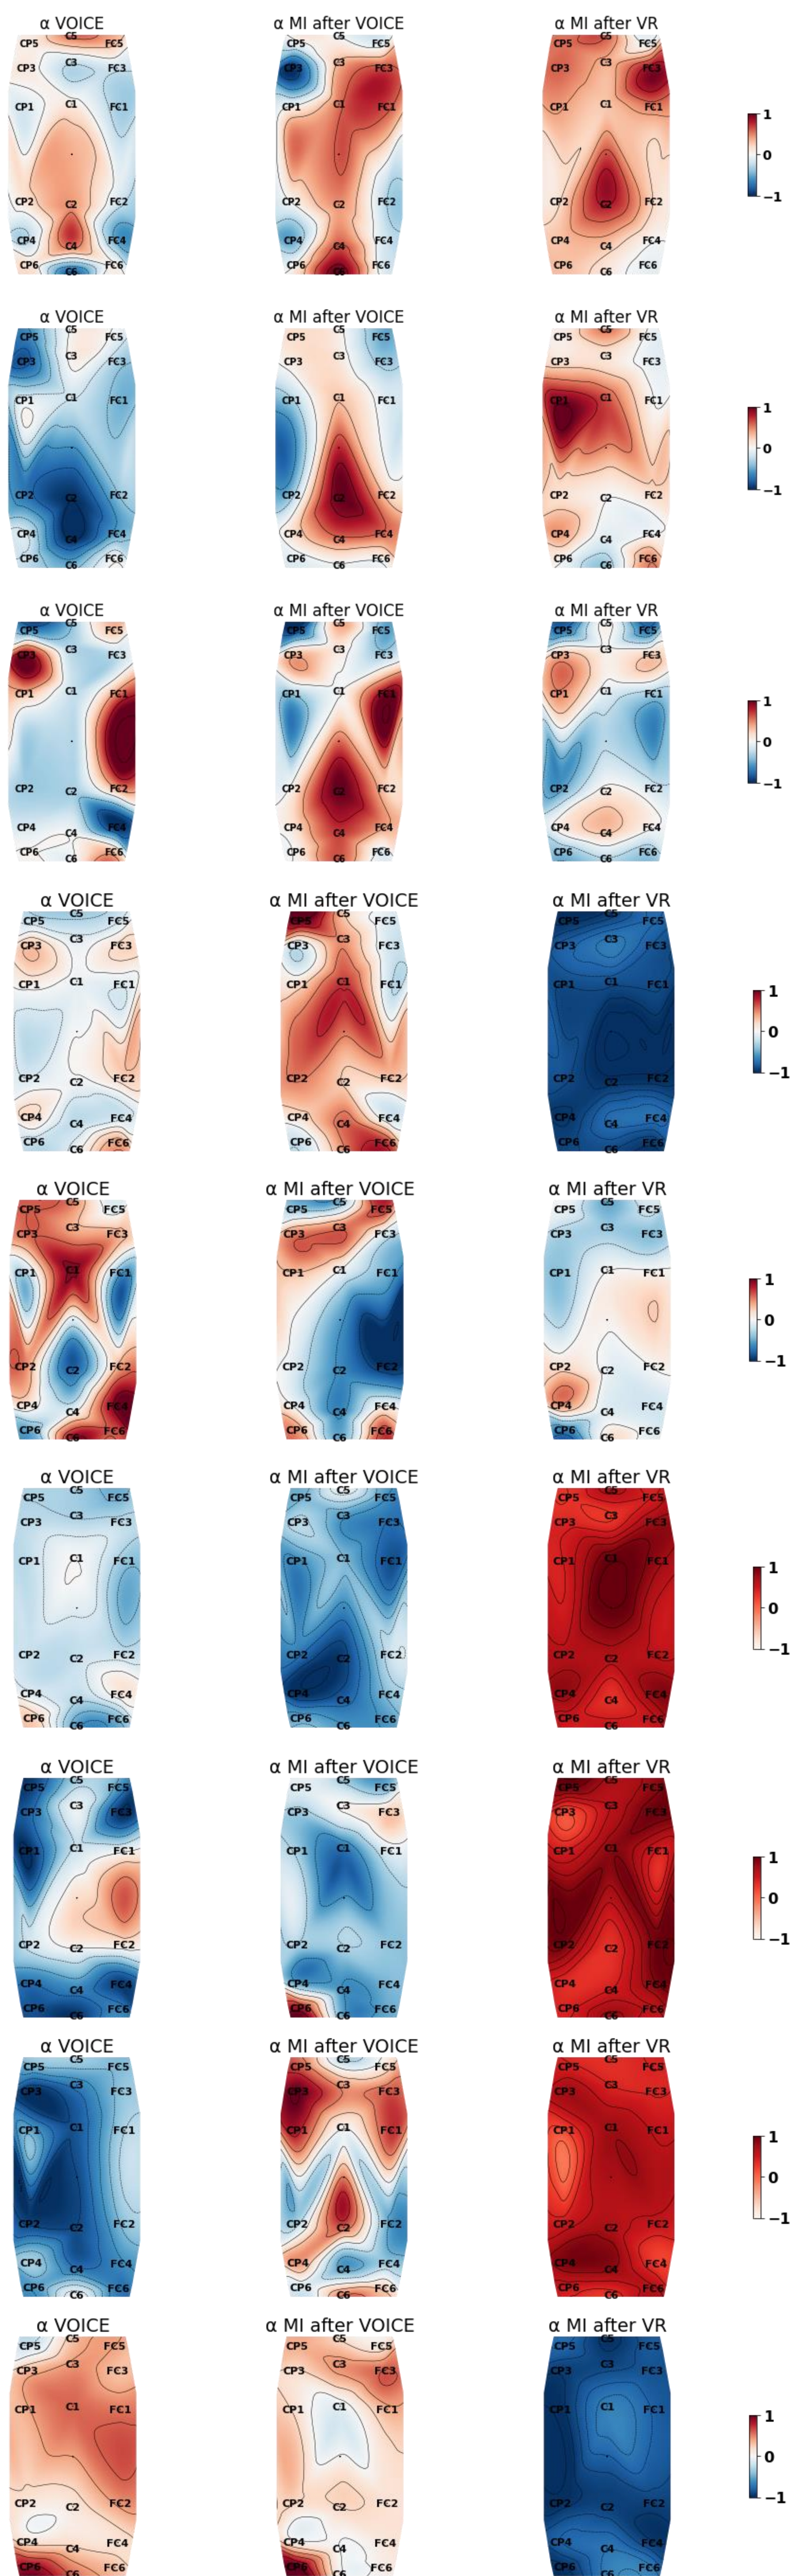

Figure 3:  $\alpha$  band power scalp maps of stroke patients 8 to 16 (top row to bottom row) from Experiment 2 showing the intensity variations normalised relative to classes: VOICE, MI after VOICE and MI after VR. Red is 1 = maximum; blue is -1 = minimum.



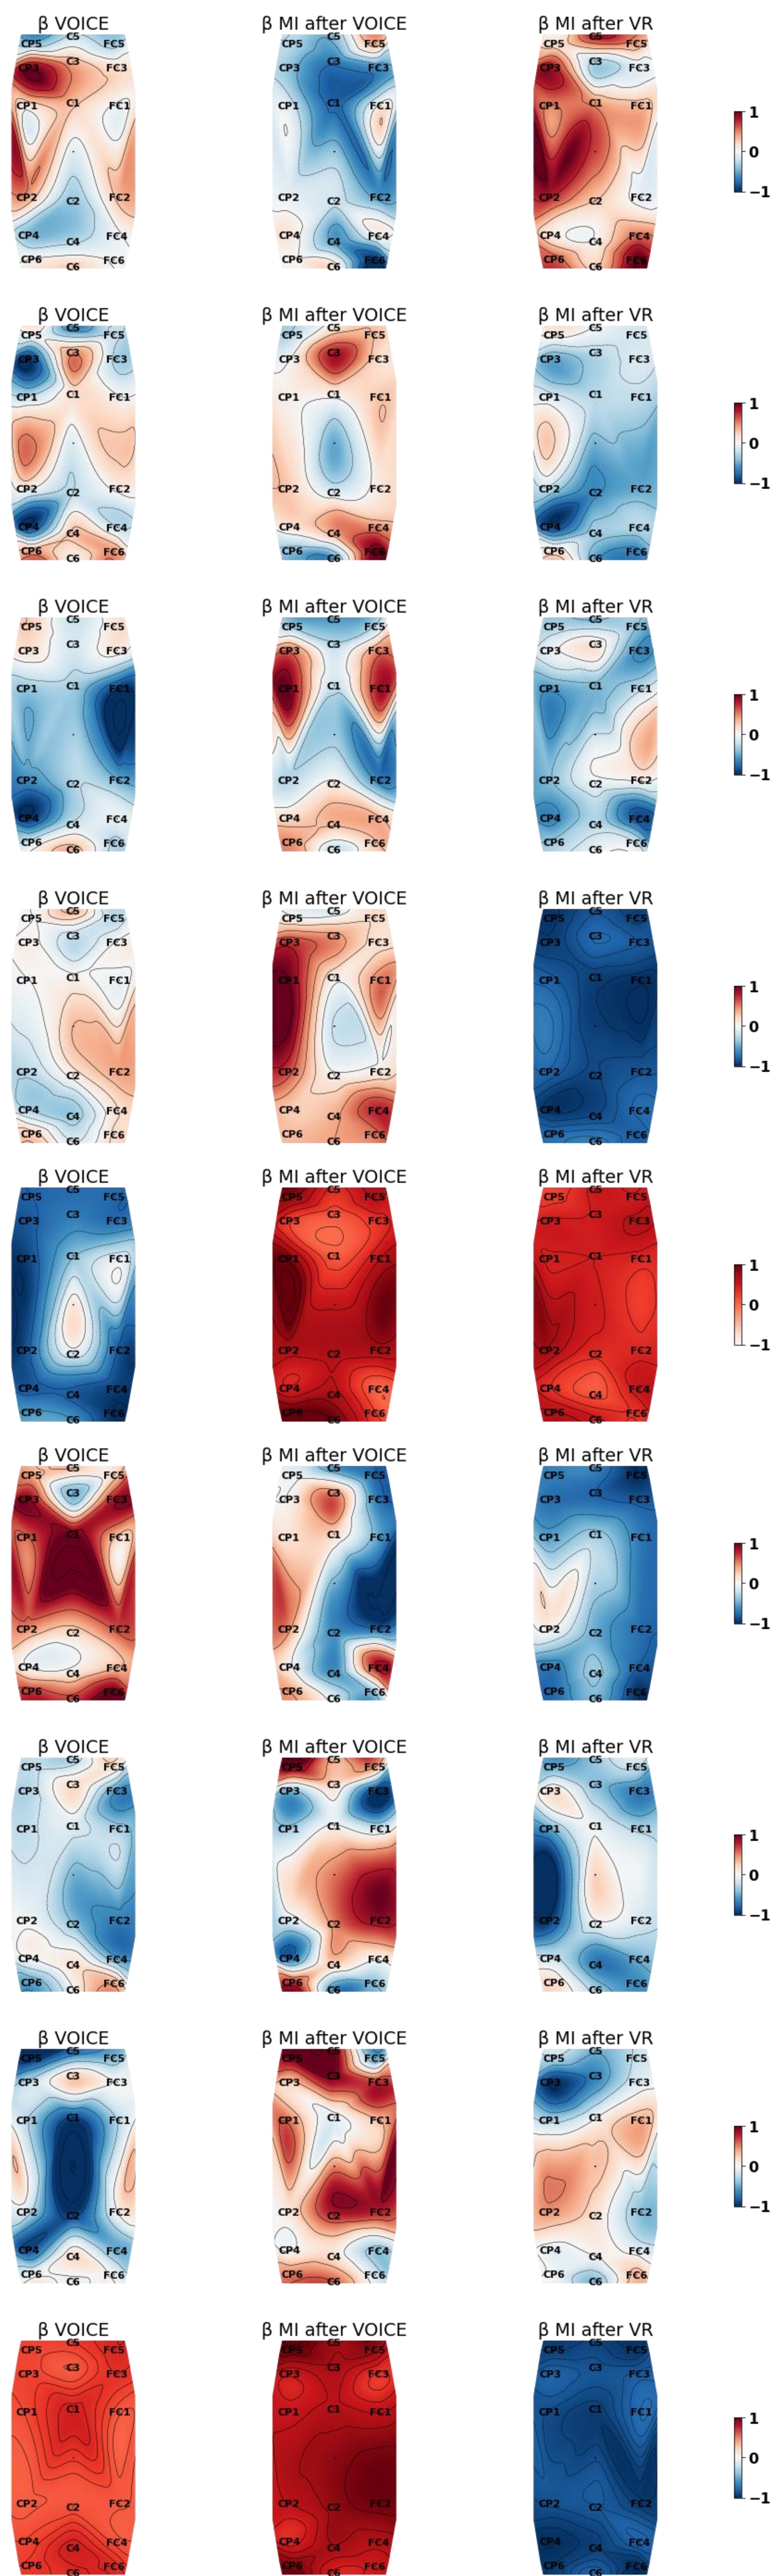

Figure 4:  $\beta$  band power scalp maps of stroke patients 8 to 16 (top row to bottom row) from Experiment 2 showing the intensity variations normalised relative to classes: VOICE, MI after VOICE and MI after VR. Red is 1 = maximum; blue is -1 = minimum.



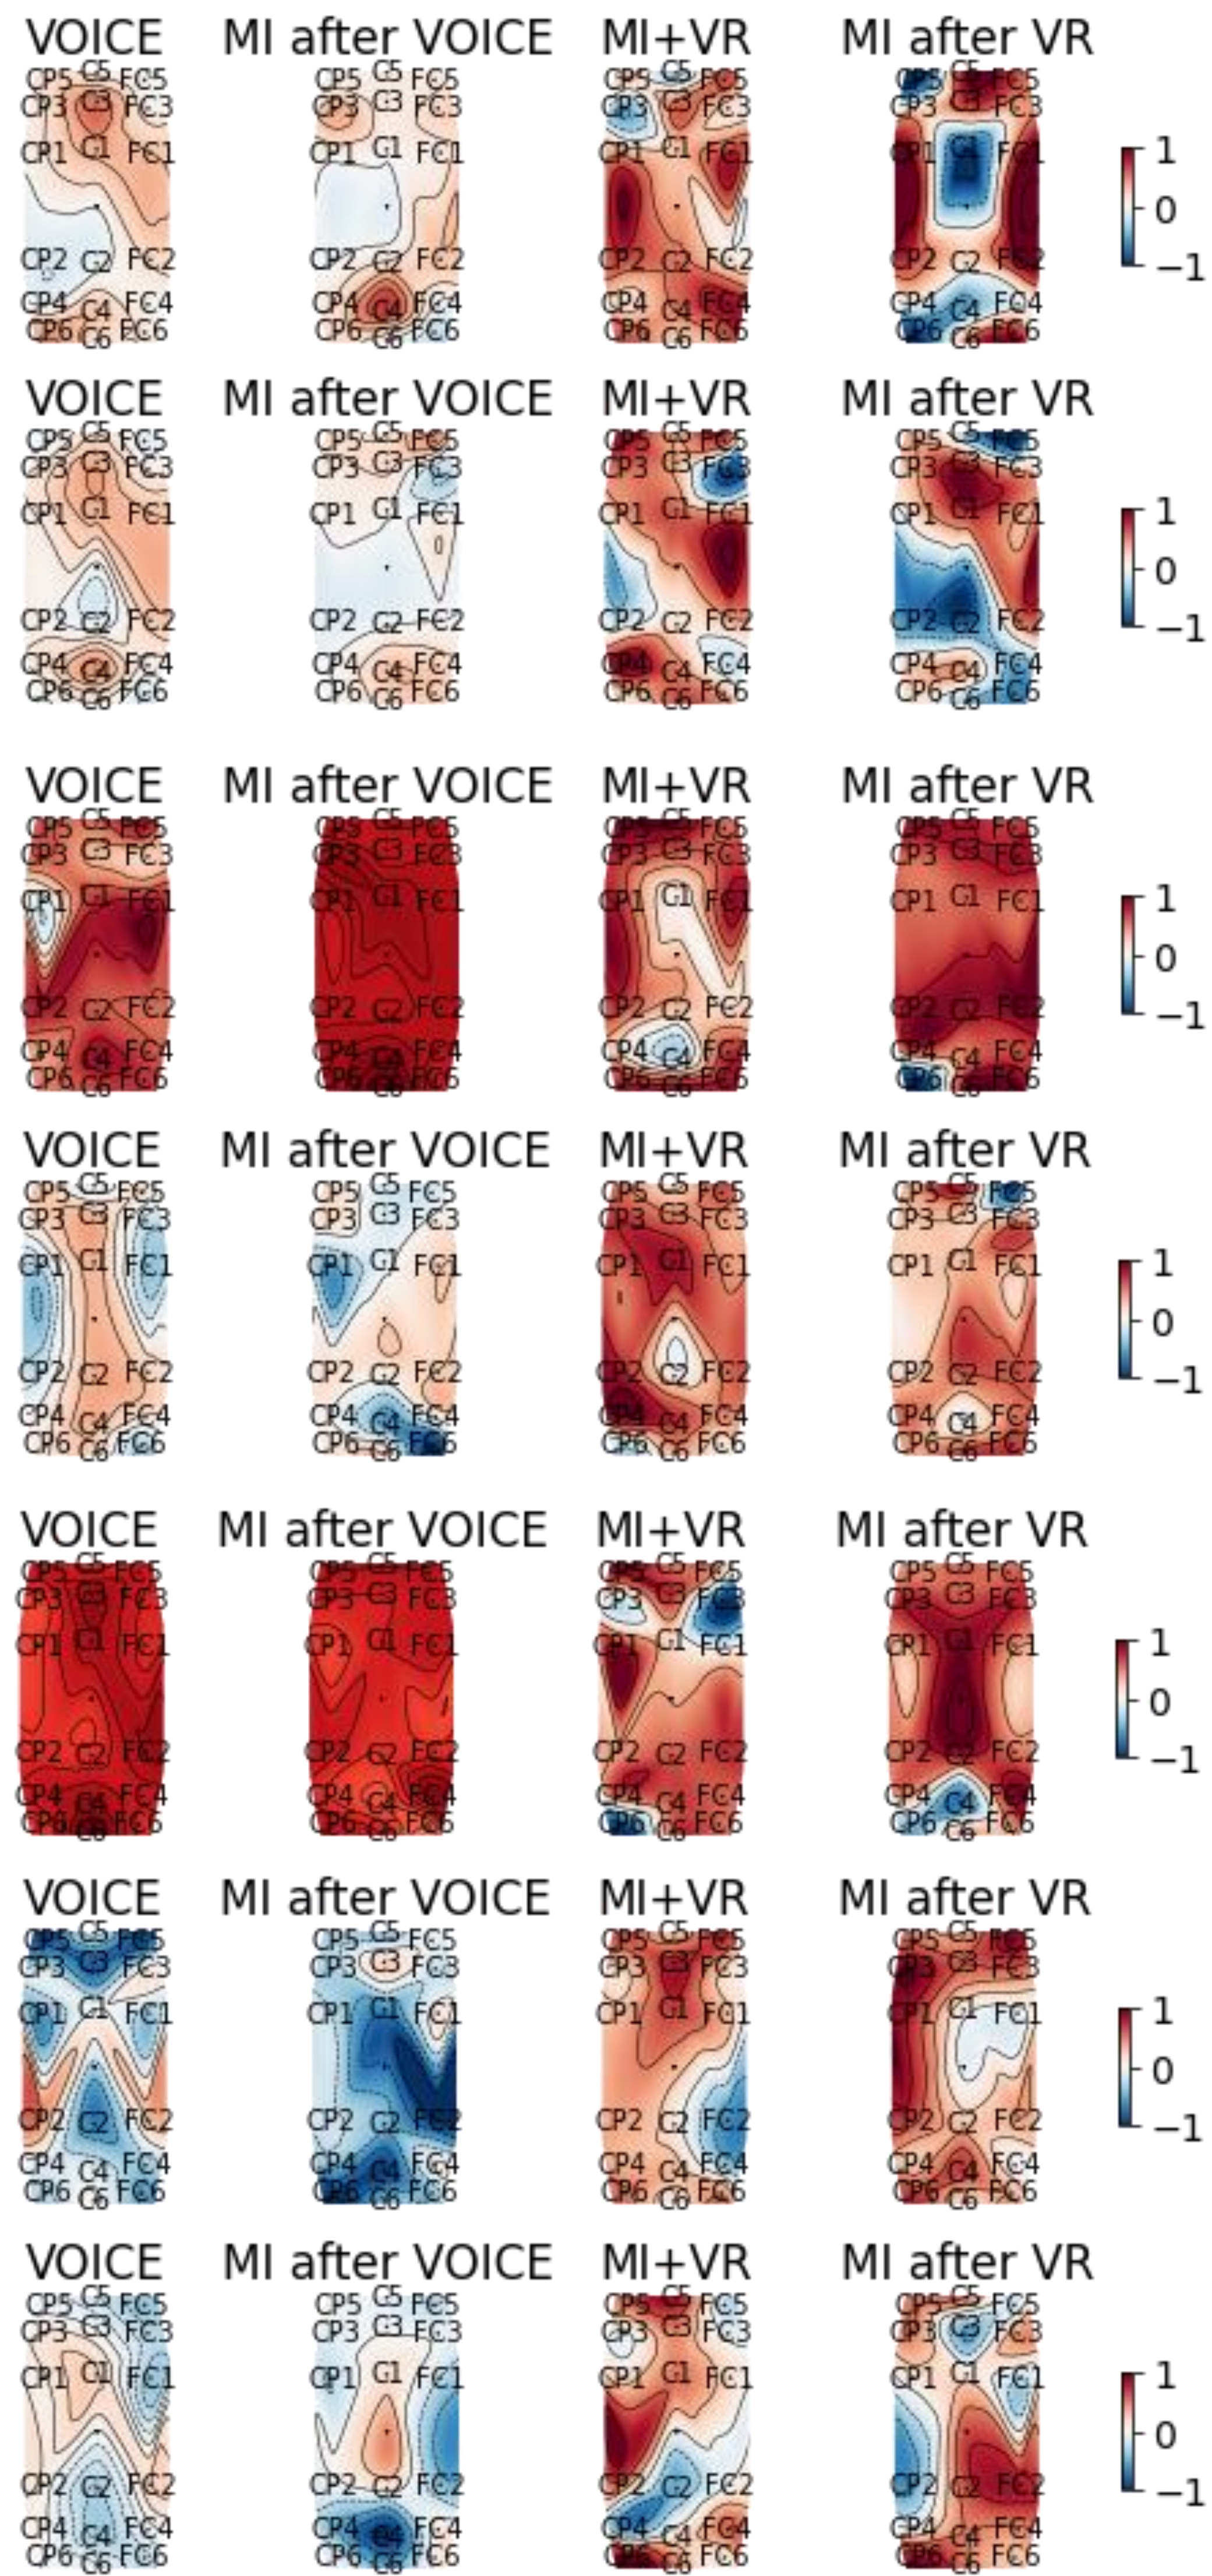

Figure 5: Spectral entropy scalp maps of stroke patients 1 to 7 (top row to bottom row) for frequencies 1-40 Hz showing the intensity variations normalised relative to classes from Experiment 1. Red is 1 = maximum; blue is -1 = minimum.



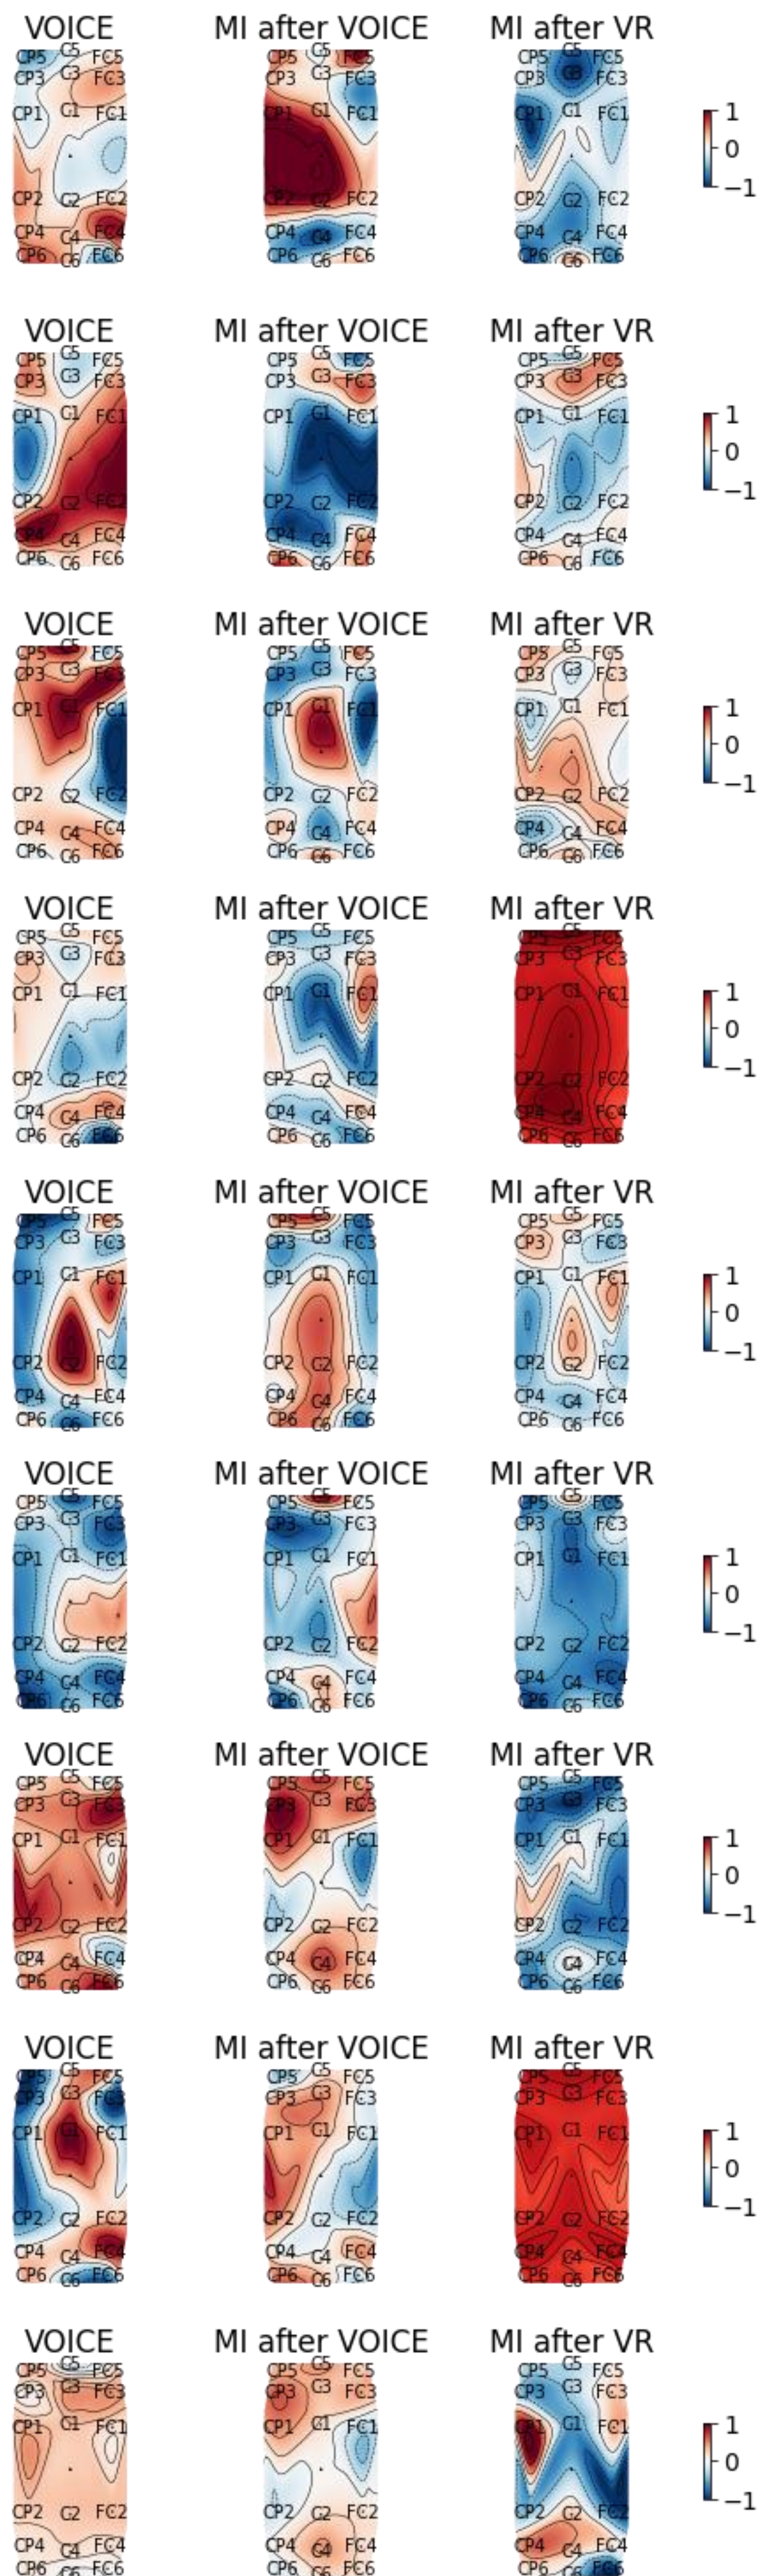

Figure 6: Spectral entropy scalp maps of stroke patients 8 to 16 (top row to bottom row) for frequencies 1-40 Hz showing the intensity variations normalised relative to classes from Experiment 2, respectively. Red is 1 = maximum; blue is -1 = minimum.
